# Supplementary material for: Monitoring the Phenolic and Terpenic Profile of Olives, Olive Oils and By-Products throughout the Production Process
Source: MDPI journal article supplement (doi:10.3390/foods13101555), 2024-05-16
Supplement: s1 [file s1]

**Table S1.** Standards and calibration curves used in the quantification of olive oils compounds.

| Standard                | Calibration Range (mg/L) | Calibration Curve      | R <sup>2</sup> |
|-------------------------|--------------------------|------------------------|----------------|
| Hydroxytyrosol          | 0.5 – 100                | $y = 132539x + 114801$ | 0.99           |
| Tyrosol                 | 0.5 – 100                | $y = 31019x + 23718$   | 0.99           |
| <i>p</i> -Coumaric acid | 0.5 – 10                 | $y = 309212x - 109517$ | 0.99           |
| Oleuropein              | 0.5 – 50                 | $y = 327798x + 513007$ | 0.98           |
| Pinoresinol             | 0.5 – 75                 | $y = 155867x + 610554$ | 0.97           |
| Luteolin                | 0.5 – 75                 | $y = 124152x + 343037$ | 0.99           |
| Apigenin                | 0.5 – 10                 | $y = 428877x - 14275$  | 0.98           |

**Table S2.** Standards and calibration curves used in the quantification of olive fruit, olive paste and by-products compounds.

| Standard                 | Calibration Range (mg/L) | Calibration Curve    | R <sup>2</sup> | LOD (mg/L)                                | LOQ (mg/L)                                |
|--------------------------|--------------------------|----------------------|----------------|-------------------------------------------|-------------------------------------------|
| Hydroxytyrosol           | 0.1 – 100                | y = 45928x + 101086  | 0.99           | $2.8 \cdot 10^{-4} \pm 4 \cdot 10^{-5}$   | $9.3 \cdot 10^{-4} \pm 1.4 \cdot 10^{-4}$ |
| <i>p</i> - Coumaric acid | 0.1 – 50                 | y = 114386x + 113145 | 0.99           | $1.7 \cdot 10^{-4} \pm 3 \cdot 10^{-5}$   | $5.3 \cdot 10^{-4} \pm 9 \cdot 10^{-5}$   |
| Oleuropein               | 0.1 – 100                | y = 277645x + 91705  | 0.99           | $8.8 \cdot 10^{-5} \pm 1.1 \cdot 10^{-5}$ | $2.9 \cdot 10^{-4} \pm 4 \cdot 10^{-5}$   |
| Pinoresinol              | 0.1 – 100                | y = 28193x - 37545   | 0.99           | $6.3 \cdot 10^{-4} \pm 1.0 \cdot 10^{-4}$ | $2.7 \cdot 10^{-3} \pm 5 \cdot 10^{-4}$   |
| Luteolin                 | 0.1 – 25                 | y = 239496x + 164132 | 0.99           | $9.3 \cdot 10^{-4} \pm 1.6 \cdot 10^{-4}$ | $3.1 \cdot 10^{-3} \pm 7 \cdot 10^{-4}$   |
| Apigenin                 | 0.1 – 25                 | y = 355194x + 197303 | 0.98           | $8.1 \cdot 10^{-5} \pm 1.4 \cdot 10^{-5}$ | $2.7 \cdot 10^{-4} \pm 5 \cdot 10^{-5}$   |
| Loganin                  | 0.1 – 25                 | y = 206516x + 120954 | 0.98           | $9.2 \cdot 10^{-5} \pm 1.1 \cdot 10^{-5}$ | $3.1 \cdot 10^{-4} \pm 4 \cdot 10^{-5}$   |
| Verbascoside             | 0.1 – 25                 | y = 199549x - 27184  | 0.99           | $2.6 \cdot 10^{-4} \pm 4 \cdot 10^{-5}$   | $8.8 \cdot 10^{-4} \pm 1.3 \cdot 10^{-4}$ |
| Luteolin-7-glucoside     | 0.1 – 25                 | y = 132767x + 56279  | 0.99           | $2.7 \cdot 10^{-4} \pm 5 \cdot 10^{-5}$   | $9.1 \cdot 10^{-4} \pm 1.7 \cdot 10^{-4}$ |
| Maslinic acid            | 0.1 – 70                 | y = 12107x + 27158   | 0.98           | $4.3 \cdot 10^{-4} \pm 6 \cdot 10^{-5}$   | $1.4 \cdot 10^{-3} \pm 2 \cdot 10^{-4}$   |

LOD: limits of detection

LOQ: limits of quantification

**Table S3.** Quantification of compounds identified in olive fruit, olive paste and olive oils.

| COMPOUNDS                | Olive fruit<br>(µg compound/g fruit) | Olive paste<br>(µg compound/g paste) | Olive oil                                           |                                                   |                                       |                                       |                                       |
|--------------------------|--------------------------------------|--------------------------------------|-----------------------------------------------------|---------------------------------------------------|---------------------------------------|---------------------------------------|---------------------------------------|
|                          |                                      |                                      | Horizontal<br>centrifuge oil<br>(µg compound/g oil) | Vertical<br>centrifuge oil<br>(µg compound/g oil) | Decanted oil 1<br>(µg compound/g oil) | Decanted oil 2<br>(µg compound/g oil) | Decanted oil 3<br>(µg compound/g oil) |
| Phenolic acids           |                                      |                                      |                                                     |                                                   |                                       |                                       |                                       |
| Total phenolic acids     | -                                    | -                                    | 1.89 ± 0.02 <sup>c</sup>                            | 0.423 ± 0.004 <sup>a</sup>                        | 0.406 ± 0.008 <sup>a</sup>            | 0.470 ± 0.003 <sup>b</sup>            | 0.46 ± 0.02 <sup>b</sup>              |
| <i>p</i> -cumaric acid   | ND                                   | ND                                   | 1.89 ± 0.02 <sup>c</sup>                            | 0.423 ± 0.004 <sup>a</sup>                        | 0.406 ± 0.008 <sup>a</sup>            | 0.470 ± 0.003 <sup>b</sup>            | 0.46 ± 0.02 <sup>b</sup>              |
| Phenolic alcohols        |                                      |                                      |                                                     |                                                   |                                       |                                       |                                       |
| Total phenolic alcohols  | 1010 ± 20 <sup>b</sup>               | 970 ± 70 <sup>b</sup>                | 54 ± 2 <sup>a</sup>                                 | 17.31 ± 0.38 <sup>a</sup>                         | 21 ± 2 <sup>a</sup>                   | 24.1 ± 0.1 <sup>a</sup>               | 24 ± 3 <sup>a</sup>                   |
| Hydroxytyrosol           | 46 ± 7 <sup>a</sup>                  | 630 ± 70 <sup>b</sup>                | 1.92 ± 0.08 <sup>a</sup>                            | 7.6 ± 0.3 <sup>a</sup>                            | 8.8 ± 0.9 <sup>a</sup>                | 10.6 ± 0.4 <sup>a</sup>               | 10 ± 2 <sup>a</sup>                   |
| Oxidized hydroxytyrosol  | ND                                   | 220 ± 20 <sup>b</sup>                | 24 ± 1 <sup>a</sup>                                 | 2.41 ± 0.07 <sup>a</sup>                          | 3.1 ± 0.2 <sup>a</sup>                | 4.2 ± 0.1 <sup>a</sup>                | 4.4 ± 0.8 <sup>a</sup>                |
| Hydroxytyrosol glucoside | 980 ± 30 <sup>b</sup>                | 79 ± 8 <sup>a</sup>                  | ND                                                  | ND                                                | ND                                    | ND                                    | ND                                    |
| Hydroxytyrosol acetate   | ND                                   | ND                                   | 1.3 ± 0.2 <sup>a</sup>                              | 2.15 ± 0.05 <sup>b</sup>                          | 2.7 ± 0.4 <sup>c</sup>                | 2.8 ± 0.2 <sup>c</sup>                | 2.8 ± 0.3 <sup>c</sup>                |
| Tyrosol                  | ND                                   | ND                                   | 26.6 ± 0.5 <sup>c</sup>                             | 5.2 ± 0.3 <sup>a</sup>                            | 6.0 ± 0.6 <sup>ab</sup>               | 6.6 ± 0.2 <sup>b</sup>                | 6.6 ± 0.5 <sup>b</sup>                |
| Secoiridoids             |                                      |                                      |                                                     |                                                   |                                       |                                       |                                       |
| Total secoiridoids       | 5100 ± 500 <sup>b</sup>              | 4800 ± 700 <sup>b</sup>              | 294 ± 8 <sup>a</sup>                                | 400 ± 20 <sup>a</sup>                             | 480 ± 30 <sup>a</sup>                 | 500 ± 10 <sup>a</sup>                 | 500 ± 10 <sup>a</sup>                 |
| Oleuropein               | 2400 ± 300 <sup>b</sup>              | 310 ± 20 <sup>a</sup>                | ND                                                  | ND                                                | ND                                    | ND                                    | ND                                    |

|                                                |                       |                         |                            |                          |                          |                          |                           |
|------------------------------------------------|-----------------------|-------------------------|----------------------------|--------------------------|--------------------------|--------------------------|---------------------------|
| Hydroxyoleuropein                              | 80 ± 8 <sup>b</sup>   | 11.8 ± 0.6 <sup>a</sup> | ND                         | ND                       | ND                       | ND                       | ND                        |
| Dihydrooleuropein                              | 41 ± 5 <sup>b</sup>   | 19 ± 3 <sup>a</sup>     | ND                         | ND                       | ND                       | ND                       | ND                        |
| Hydroxy D-oleuropein aglycone                  | ND                    | ND                      | 0.54 ± 0.02 <sup>a</sup>   | 1.34 ± 0.03 <sup>b</sup> | 3.0 ± 0.1 <sup>c</sup>   | 5.2 ± 0.1 <sup>e</sup>   | 4.4 ± 0.2 <sup>d</sup>    |
| 10-hydroxy oleuropein aglycone                 | ND                    | ND                      | 0.259 ± 0.005 <sup>a</sup> | 0.59 ± 0.02 <sup>d</sup> | 0.21 ± 0.04 <sup>a</sup> | 0.64 ± 0.07 <sup>e</sup> | 0.47 ± 0.07 <sup>c</sup>  |
| Oleuropein aglycone isomer 1                   | 160 ± 10 <sup>b</sup> | 30 ± 6 <sup>ab</sup>    | 8.4 ± 0.1 <sup>a</sup>     | 42 ± 5 <sup>a</sup>      | 42 ± 8 <sup>a</sup>      | 47 ± 5 <sup>a</sup>      | 46 ± 5 <sup>a</sup>       |
| Oleuropein aglycone isomer 2                   | 400 ± 30 <sup>b</sup> | 22 ± 4 <sup>a</sup>     | 8.2 ± 0.5 <sup>a</sup>     | 20 ± 1 <sup>a</sup>      | 20 ± 2 <sup>a</sup>      | 20 ± 1 <sup>a</sup>      | 20 ± 1 <sup>a</sup>       |
| Oleuropein aglycone isomer 3                   | 210 ± 6 <sup>c</sup>  | 12 ± 2 <sup>a</sup>     | 5.8 ± 0.6 <sup>a</sup>     | 19.1 ± 0.8 <sup>b</sup>  | 19 ± 2 <sup>b</sup>      | 21 ± 1 <sup>b</sup>      | 19 ± 2 <sup>b</sup>       |
| Oleuropein aglycone isomer 4                   | 120 ± 10 <sup>c</sup> | 53 ± 10 <sup>b</sup>    | 3.3 ± 0.5 <sup>a</sup>     | 5.2 ± 0.4 <sup>a</sup>   | 5.1 ± 0.5 <sup>a</sup>   | 6.2 ± 0.3 <sup>a</sup>   | 5.7 ± 0.4 <sup>a</sup>    |
| Oleuropein aglycone isomer 5                   | 160 ± 30 <sup>c</sup> | 123 ± 30 <sup>b</sup>   | 95 ± 9 <sup>ab</sup>       | 74 ± 4 <sup>a</sup>      | 89 ± 8 <sup>a</sup>      | 93 ± 6 <sup>ab</sup>     | 89 ± 4 <sup>a</sup>       |
| Oleuropein aglycone isomer 6                   | 40 ± 5 <sup>a</sup>   | 480 ± 40 <sup>b</sup>   | 41 ± 3 <sup>a</sup>        | 43 ± 7 <sup>a</sup>      | 55 ± 6 <sup>a</sup>      | 62 ± 7 <sup>a</sup>      | 66 ± 6 <sup>a</sup>       |
| Oleacein / Decarboxymethyl oleuropein aglycone | 940 ± 90 <sup>a</sup> | 3600 ± 720 <sup>b</sup> | 51 ± 1 <sup>a</sup>        | 91 ± 2 <sup>a</sup>      | 147 ± 5 <sup>a</sup>     | 146 ± 5 <sup>a</sup>     | 144 ± 4 <sup>a</sup>      |
| Ligstroside                                    | 260 ± 10 <sup>b</sup> | 220 ± 20 <sup>a</sup>   | ND                         | ND                       | ND                       | ND                       | ND                        |
| Ligstroside aglycone isomer 1                  | 22 ± 4 <sup>d</sup>   | 8.0 ± 0.2 <sup>a</sup>  | 9 ± 1 <sup>ab</sup>        | 16.6 ± 0.9 <sup>c</sup>  | 13.2 ± 0.4 <sup>bc</sup> | 14 ± 1 <sup>c</sup>      | 13.0 ± 0.6 <sup>bc</sup>  |
| Ligstroside aglycone isomer 2                  | 29 ± 5 <sup>c</sup>   | 57 ± 7 <sup>d</sup>     | 15 ± 2 <sup>a</sup>        | 24 ± 1 <sup>bc</sup>     | 21 ± 1 <sup>ab</sup>     | 24 ± 1 <sup>bc</sup>     | 22.3 ± 0.7 <sup>abc</sup> |
| Ligstroside aglycone isomer 3                  | 18 ± 2 <sup>bc</sup>  | 7 ± 2 <sup>a</sup>      | 17 ± 2 <sup>b</sup>        | 24 ± 1 <sup>d</sup>      | 21 ± 2 <sup>bc</sup>     | 22 ± 11 <sup>cd</sup>    | 22 ± 21 <sup>cd</sup>     |

|                                                     |                             |                             |                                |                                |                                |                                  |                                 |
|-----------------------------------------------------|-----------------------------|-----------------------------|--------------------------------|--------------------------------|--------------------------------|----------------------------------|---------------------------------|
| Ligstroside aglycone isomer 4                       | 15 ± 2 <sup>b</sup>         | 8 ± 1 <sup>a</sup>          | 14 ± 2 <sup>b</sup>            | 19 ± 1 <sup>cd</sup>           | 20 ± 1 <sup>cd</sup>           | 19.0 ± 0.9 <sup>c</sup>          | 22 ± 1 <sup>d</sup>             |
| Ligstroside aglycone isomer 5                       | 7 ± 1 <sup>b</sup>          | 47 ± 5 <sup>c</sup>         | 1.95 ± 0.07 <sup>a</sup>       | 3.19 ± 0.07 <sup>ab</sup>      | 3.0 ± 0.3 <sup>ab</sup>        | 3.1 ± 0.2 <sup>ab</sup>          | 3.5 ± 0.2 <sup>ab</sup>         |
| Oleocanthal / Decarboxymethyl ligstroside aglycon   | ND                          | NQ                          | 23.2 ± 0.9 <sup>b</sup>        | 19.58 ± 0.39 <sup>a</sup>      | 23 ± 1 <sup>b</sup>            | 24 ± 1 <sup>bc</sup>             | 25 ± 1 <sup>c</sup>             |
| <b>Lignans</b>                                      |                             |                             |                                |                                |                                |                                  |                                 |
| <b>Total lignans</b>                                | -                           | -                           | <b>1.11 ± 0.09<sup>c</sup></b> | <b>0.56 ± 0.02<sup>b</sup></b> | <b>0.41 ± 0.05<sup>a</sup></b> | <b>0.46 ± 0.02<sup>a</sup></b>   | <b>0.48 ± 0.03<sup>ab</sup></b> |
| Syringaresinol                                      | ND                          | ND                          | 0.74 ± 0.03 <sup>c</sup>       | 0.37 ± 0.02 <sup>ab</sup>      | 0.26 ± 0.04 <sup>a</sup>       | 0.29 ± 0.01 <sup>ab</sup>        | 0.32 ± 0.03 <sup>ab</sup>       |
| Pinoresinol                                         | ND                          | ND                          | 0.37 ± 0.04 <sup>b</sup>       | 0.18 ± 0.02 <sup>a</sup>       | 0.15 ± 0.01 <sup>a</sup>       | 0.17 ± 0.02 <sup>a</sup>         | 0.160 ± 0.008 <sup>a</sup>      |
| <b>Flavonoids</b>                                   |                             |                             |                                |                                |                                |                                  |                                 |
| <b>Total flavonoids</b>                             | <b>116 ± 7<sup>b</sup></b>  | <b>121 ± 3<sup>b</sup></b>  | <b>4.3 ± 0.2<sup>a</sup></b>   | <b>1.40 ± 0.05<sup>a</sup></b> | <b>0.77 ± 0.02<sup>a</sup></b> | <b>0.801 ± 0.006<sup>a</sup></b> | <b>0.65 ± 0.08<sup>a</sup></b>  |
| Luteolin                                            | 17 ± 2 <sup>c</sup>         | 24 ± 3 <sup>d</sup>         | 3.8 ± 0.3 <sup>b</sup>         | 1.1 ± 0.1 <sup>a</sup>         | 0.56 ± 0.03 <sup>a</sup>       | 0.60 ± 0.09 <sup>a</sup>         | 0.48 ± 0.08 <sup>a</sup>        |
| Luteolin glucoside                                  | 100 ± 6 <sup>a</sup>        | 97 ± 6 <sup>a</sup>         | ND                             | ND                             | ND                             | ND                               | ND                              |
| Apigenin                                            | ND                          | ND                          | 0.51 ± 0.04 <sup>c</sup>       | 0.28 ± 0.02 <sup>b</sup>       | 0.21 ± 0.02 <sup>a</sup>       | 0.206 ± 0.006 <sup>a</sup>       | 0.178 ± 0.005 <sup>a</sup>      |
| <b>Phenylpropanoid/phenylethanol</b>                |                             |                             |                                |                                |                                |                                  |                                 |
| <b>Tota/phenyletanol</b>                            | <b>80 ± 5<sup>a</sup></b>   | <b>110 ± 10<sup>b</sup></b> | <b>ND</b>                      | <b>ND</b>                      | <b>ND</b>                      | <b>ND</b>                        | <b>ND</b>                       |
| Verbascoside                                        | 80 ± 5 <sup>a</sup>         | 110 ± 10 <sup>b</sup>       | ND                             | ND                             | ND                             | ND                               | ND                              |
| <b>Oleoside and elenolic acid derivatives</b>       |                             |                             |                                |                                |                                |                                  |                                 |
| <b>Total oleoside and elenolic acid derivatives</b> | <b>890 ± 50<sup>c</sup></b> | <b>650 ± 10<sup>b</sup></b> | <b>16 ± 1<sup>a</sup></b>      | <b>7.5 ± 0.3<sup>a</sup></b>   | <b>10 ± 1<sup>a</sup></b>      | <b>13.00 ± 0.04<sup>a</sup></b>  | <b>13 ± 2<sup>a</sup></b>       |
| Oleoside                                            | 220 ± 10 <sup>b</sup>       | 130 ± 20 <sup>a</sup>       | ND                             | ND                             | ND                             | ND                               | ND                              |

|                                                             |                              |                              |                          |                          |                        |                        |                        |
|-------------------------------------------------------------|------------------------------|------------------------------|--------------------------|--------------------------|------------------------|------------------------|------------------------|
| Elenolic acid isomer<br>1                                   | 70 ± 10 <sup>b</sup>         | 280 ± 30 <sup>c</sup>        | 0.70 ± 0.02 <sup>a</sup> | 3.3 ± 0.2 <sup>a</sup>   | 4.2 ± 0.4 <sup>a</sup> | 5.0 ± 0.3 <sup>a</sup> | 5.2 ± 0.6 <sup>a</sup> |
| Elenolic acid isomer<br>2                                   | ND                           | ND                           | 7.6 ± 0.5 <sup>c</sup>   | 3.6 ± 0.1 <sup>a</sup>   | 4.4 ± 0.4 <sup>a</sup> | 5.6 ± 0.4 <sup>b</sup> | 5.9 ± 0.7 <sup>b</sup> |
| Dialdehydic form of<br>decarbox-ymethyl<br>elenolic acid    | 109 ± 7 <sup>c</sup>         | 80 ± 10 <sup>b</sup>         | 7.4 ± 0.4 <sup>a</sup>   | 0.55 ± 0.03 <sup>a</sup> | 1.2 ± 0.2 <sup>a</sup> | 2.4 ± 0.2 <sup>a</sup> | 2.1 ± 0.3 <sup>a</sup> |
| 1-β-D-<br>Glucopyranosyl<br>acyclodihydroeleno-<br>lic acid | 140 ± 10 <sup>b</sup>        | 80 ± 10 <sup>a</sup>         | ND                       | ND                       | ND                     | ND                     | ND                     |
| Elenolic acid<br>glucoside                                  | 350 ± 20 <sup>b</sup>        | 100 ± 10 <sup>a</sup>        | ND                       | ND                       | ND                     | ND                     | ND                     |
| <b>Terpenes</b>                                             |                              |                              |                          |                          |                        |                        |                        |
| <b>Total terpenes</b>                                       | <b>1200 ± 30<sup>b</sup></b> | <b>1060 ± 20<sup>a</sup></b> | -                        | -                        | -                      | -                      | -                      |
| Loganic acid                                                | 62 ± 5 <sup>b</sup>          | 50 ± 3 <sup>a</sup>          | ND                       | ND                       | ND                     | ND                     | ND                     |
| Maslinic acid                                               | 1140 ± 50 <sup>b</sup>       | 1010 ± 50 <sup>a</sup>       | ND                       | ND                       | ND                     | ND                     | ND                     |

ND non-detected

NQ non-quantified

Different letters mean significant differences ( $p < 0.05$ ) between samples for every variable, with increasing letters indicating increasing values.

**Table S4.** Quantification of compounds identified in olive oil by-products.

| COMPOUNDS                              | Leaf<br>( $\mu\text{g compound/g leaf}$ ) | “Alpeorujo”<br>( $\mu\text{g compound/g alpeorujo}$ ) | “Borras” liquid<br>residues<br>( $\mu\text{g compound/mL BLR}$ ) | “Borras” solid<br>residues<br>( $\mu\text{g compound/g BSR}$ ) | Olive fruit<br>washing water<br>( $\mu\text{g compound/mL OFWW}$ ) |
|----------------------------------------|-------------------------------------------|-------------------------------------------------------|------------------------------------------------------------------|----------------------------------------------------------------|--------------------------------------------------------------------|
| <b>Phenolic alcohols</b>               |                                           |                                                       |                                                                  |                                                                |                                                                    |
| <b>Total phenolic alcohols</b>         | -                                         | $900 \pm 100^a$                                       | $3000 \pm 300^b$                                                 | $3700 \pm 200^c$                                               | -                                                                  |
| Hydroxytyrosol                         | ND                                        | $540 \pm 90^a$                                        | $700 \pm 100^a$                                                  | $1200 \pm 100^b$                                               | ND                                                                 |
| Oxidized hydroxytyrosol                | ND                                        | $170 \pm 30^a$                                        | $1300 \pm 100^b$                                                 | $1500 \pm 100^b$                                               | ND                                                                 |
| Tyrosol                                | ND                                        | $100 \pm 20^a$                                        | $150 \pm 20^b$                                                   | $123 \pm 4^{ab}$                                               | ND                                                                 |
| 3,4-Dihydroxyphenylglycol              | ND                                        | ND                                                    | $830 \pm 80^a$                                                   | $830 \pm 40^a$                                                 | ND                                                                 |
| <b>Secoiridoids</b>                    |                                           |                                                       |                                                                  |                                                                |                                                                    |
| <b>Total secoiridoids</b>              | $69 \pm 1^a$                              | $4500 \pm 500^b$                                      | $220 \pm 30^a$                                                   | $680 \pm 20^a$                                                 | -                                                                  |
| Oleuropein                             | $24 \pm 2^b$                              | $70 \pm 10^c$                                         | ND                                                               | $7.6 \pm 0.4^a$                                                | ND                                                                 |
| Hydroxyoleuropein                      | $46 \pm 4$                                | ND                                                    | ND                                                               | ND                                                             | ND                                                                 |
| Dihydrooleuropein                      | ND                                        | $36 \pm 5$                                            | ND                                                               | ND                                                             | ND                                                                 |
| Hydroxyoleuropein aglycone<br>isomer 1 | ND                                        | ND                                                    | $27 \pm 5^a$                                                     | $58 \pm 1^b$                                                   | ND                                                                 |
| Hydroxyoleuropein aglycone<br>isomer 2 | ND                                        | ND                                                    | $89 \pm 9^a$                                                     | $107 \pm 1^b$                                                  | ND                                                                 |
| Hydroxyoleuropein aglycone<br>isomer 3 | ND                                        | ND                                                    | $22 \pm 4^a$                                                     | $96 \pm 1^b$                                                   | ND                                                                 |
| Hydroxyoleuropein aglycone<br>isomer 4 | ND                                        | ND                                                    | ND                                                               | $39.3 \pm 0.9$                                                 | ND                                                                 |

|                                                         |                             |                               |                                |                               |                          |
|---------------------------------------------------------|-----------------------------|-------------------------------|--------------------------------|-------------------------------|--------------------------|
| Hydroxydecarboxymethyloleuropein aglycone               | ND                          | 190 ± 10 <sup>b</sup>         | 26 ± 4 <sup>a</sup>            | 49 ± 2 <sup>a</sup>           | ND                       |
| Oleuropein aglycone isomer 1                            | ND                          | 400 ± 70 <sup>b</sup>         | 36 ± 5 <sup>a</sup>            | 37 ± 4 <sup>a</sup>           | ND                       |
| Oleuropein aglycone isomer 2                            | ND                          | 130 ± 20 <sup>b</sup>         | ND                             | 53 ± 4 <sup>a</sup>           | ND                       |
| Oleuropein aglycone isomer 3                            | ND                          | 36 ± 7 <sup>a</sup>           | ND                             | 160 ± 7 <sup>b</sup>          | ND                       |
| Oleacein /<br>Decarboxymethyl oleuropein aglycone       | ND                          | 3500 ± 500 <sup>b</sup>       | ND                             | 18 ± 2 <sup>a</sup>           | ND                       |
| Hydrated oleuropein aglycone                            | ND                          | 40 ± 5 <sup>b</sup>           | 21 ± 3 <sup>a</sup>            | 55 ± 3 <sup>b</sup>           | ND                       |
| <b>Flavonoids</b>                                       |                             |                               |                                |                               |                          |
| <b>Total flavonoids</b>                                 | <b>720 ± 20<sup>c</sup></b> | <b>120 ± 20<sup>b</sup></b>   | <b>4.9 ± 0.3<sup>a</sup></b>   | <b>120 ± 10<sup>b</sup></b>   | <b>-</b>                 |
| Diosmetin                                               | 113 ± 8                     | ND                            | ND                             | ND                            | ND                       |
| Diosmetin glucoside isomer 1                            | 98 ± 6                      | ND                            | ND                             | ND                            | ND                       |
| Diosmetin glucoside isomer 2                            | 49 ± 2                      | ND                            | ND                             | ND                            | ND                       |
| Luteolin                                                | 50 ± 3 <sup>c</sup>         | 24 ± 4 <sup>b</sup>           | 4.9 ± 0.3 <sup>a</sup>         | 120 ± 10 <sup>d</sup>         | ND                       |
| Luteolin glucoside                                      | 260 ± 10 <sup>b</sup>       | 90 ± 10 <sup>a</sup>          | ND                             | ND                            | ND                       |
| Apigenin                                                | 37 ± 3                      | ND                            | ND                             | ND                            | ND                       |
| Apigenin-7-O-glucoside                                  | 21 ± 2                      | ND                            | ND                             | ND                            | ND                       |
| Apigenin-7-O-rutinoside                                 | 100 ± 4                     | ND                            | ND                             | ND                            | ND                       |
| <b>Phenylpropanoid/phenyletanol</b>                     |                             |                               |                                |                               |                          |
| <b>Total phenylpropanoid/<br/>phenyletanol</b>          | <b>-</b>                    | <b>120 ± 10</b>               | <b>-</b>                       | <b>-</b>                      | <b>-</b>                 |
| Verbascoside                                            | ND                          | 120 ± 10                      | ND                             | ND                            | ND                       |
| <b>Oleoside and elenolic acid derivatives</b>           |                             |                               |                                |                               |                          |
| <b>Total oleoside and elenolic acid<br/>derivatives</b> | <b>226 ± 9<sup>a</sup></b>  | <b>2000 ± 300<sup>c</sup></b> | <b>1700 ± 100<sup>bc</sup></b> | <b>1500 ± 200<sup>b</sup></b> | <b>6 ± 1<sup>a</sup></b> |



|                                                                                        |                 |                |                 |                |                   |
|----------------------------------------------------------------------------------------|-----------------|----------------|-----------------|----------------|-------------------|
| Oleoside                                                                               | $41 \pm 3^a$    | $180 \pm 10^b$ | ND              | ND             | ND                |
| Elenolic acid                                                                          | $18 \pm 2^a$    | $310 \pm 50^b$ | $500 \pm 80^c$  | $260 \pm 20^b$ | ND                |
| Hydrated product of the dialdehydic form of decarboxymethyl elenolic acid isomer 1     | $7 \pm 1$       | ND             | ND              | ND             | ND                |
| Hydrated product of the dialdehydic form of decarboxymethyl elenolic acid isomer 2     | $8.3 \pm 0.9$   | ND             | ND              | ND             | ND                |
| Hydrated product of the dialdehydic form of decarboxymethyl elenolic acid isomer 3     | ND              | ND             | $150 \pm 10^b$  | $170 \pm 10^b$ | $0.8 \pm 0.1^a$   |
| Dialdehydic form of decarboxymethyl elenolic acid isomer 1                             | ND              | ND             | $71 \pm 7$      | ND             | ND                |
| Dialdehydic form of decarboxymethyl elenolic acid isomer 2                             | $6.7 \pm 0.2^a$ | $330 \pm 30^c$ | $100 \pm 10^b$  | $104 \pm 4^b$  | ND                |
| Dialdehydic form of decarboxymethyl elenolic acid isomer 3                             | ND              | ND             | ND              | ND             | $2.7 \pm 0.5$     |
| 1-β-D-Glucopyranosyl acyclodihydroelenolic acid                                        | $83 \pm 3^a$    | $150 \pm 30^b$ | ND              | ND             | ND                |
| Hydroxylated product of the dialdehydic form of decarboxymethyl elenolic acid isomer 1 | $15 \pm 1$      | ND             | ND              | ND             | ND                |
| Hydroxylated product of the dialdehydic form of decarboxymethyl elenolic acid isomer 2 | $7.9 \pm 0.8^a$ | $460 \pm 60^b$ | $600 \pm 100^c$ | $630 \pm 90^c$ | $0.38 \pm 0.07^a$ |
| Hydroxyelenolic acid                                                                   | ND              | $90 \pm 20^a$  | $240 \pm 40^b$  | $260 \pm 20^b$ | ND                |
| Decarboxylated form of hydroxyelenolic acid                                            | $6.8 \pm 0.8^b$ | ND             | ND              | ND             | $0.9 \pm 0.2^a$   |

|                                                 |                               |                               |                     |                             |                          |
|-------------------------------------------------|-------------------------------|-------------------------------|---------------------|-----------------------------|--------------------------|
| Decarboxymethyl-3,4-dihydroelenolic acid        | ND                            | 270 ± 20 <sup>b</sup>         | ND                  | ND                          | 0.37 ± 0.04 <sup>a</sup> |
| Elenolic acid glucoside                         | 38 ± 2 <sup>a</sup>           | 130 ± 20 <sup>b</sup>         | ND                  | ND                          | ND                       |
| Aldehydic form of decarboxymethyl elenolic acid | ND                            | 12 ± 2 <sup>b</sup>           | 43 ± 5 <sup>c</sup> | 51 ± 5 <sup>c</sup>         | 0.24 ± 0.03 <sup>a</sup> |
| <b>Terpenes</b>                                 |                               |                               |                     |                             |                          |
| <b>Total terpenes</b>                           | <b>5000 ± 300<sup>c</sup></b> | <b>1200 ± 100<sup>b</sup></b> | <b>-</b>            | <b>120 ± 20<sup>a</sup></b> | <b>-</b>                 |
| Loganic acid                                    | 16 ± 1 <sup>a</sup>           | 17 ± 3 <sup>a</sup>           | ND                  | ND                          | ND                       |
| 7-Epiloganin                                    | 35 ± 2                        | ND                            | ND                  | ND                          | ND                       |
| Lamiol                                          | 32 ± 2                        | ND                            | ND                  | ND                          | ND                       |
| Methyl jasmonate                                | 3.9 ± 0.4                     | ND                            | ND                  | ND                          | ND                       |
| Maslinic acid                                   | 1470 ± 90 <sup>b</sup>        | 1200 ± 100 <sup>b</sup>       | ND                  | 120 ± 20 <sup>a</sup>       | ND                       |
| Oleanolic acid                                  | 42 ± 7                        | ND                            | ND                  | ND                          | ND                       |
| Dihydroxyoleanolic acid isomer 1                | 1490 ± 50                     | ND                            | ND                  | ND                          | ND                       |
| Dihydroxyoleanolic acid isomer 2                | 1070 ± 80                     | ND                            | ND                  | ND                          | ND                       |
| Hydroxy-oxo-oleanoic acid                       | 830 ± 80                      | ND                            | ND                  | ND                          | ND                       |

ND non-detected

Different letters mean significant differences ( $p < 0.05$ ) between samples for every variable, with increasing letters indicating increasing values.
